# Supplementary material for: Spatial organization of the mouse retina at single cell resolution by MERFISH
Source: PubMed Central journal article supplement (PMC10427710; doi:10.1038/s41467-023-40674-3), 2023-08-15
Supplement: 41467_2023_40674_MOESM3_ESM.pdf [file 41467_2023_40674_MOESM3_ESM.pdf]

## **Description of Additional Supplementary Files**

File Name: Supplementary Data 1

Description: Lists of genes included in the MERFISH probe panels

File Name: Supplementary Data 2

Description: Gene set enrichment analysis result of spatially dependent genes in non-displaced and displaced AC subtypes
